# Supplementary material for: Cardiovascular Outcomes of Obesity According to Menopausal Status: A Nationwide Population-Based Study
Source: PubMed Central journal article supplement — Endocrinol Metab (Seoul). 2021 Oct 21;36(5):1029–41. doi: 10.3803/EnM.2021.1197 (PMC8566123; doi:10.3803/enm.2021.1197), 2021-10-21
Supplement: enm-2021-1197-suppl5.pdf [file enm-2021-1197-suppl5.pdf]

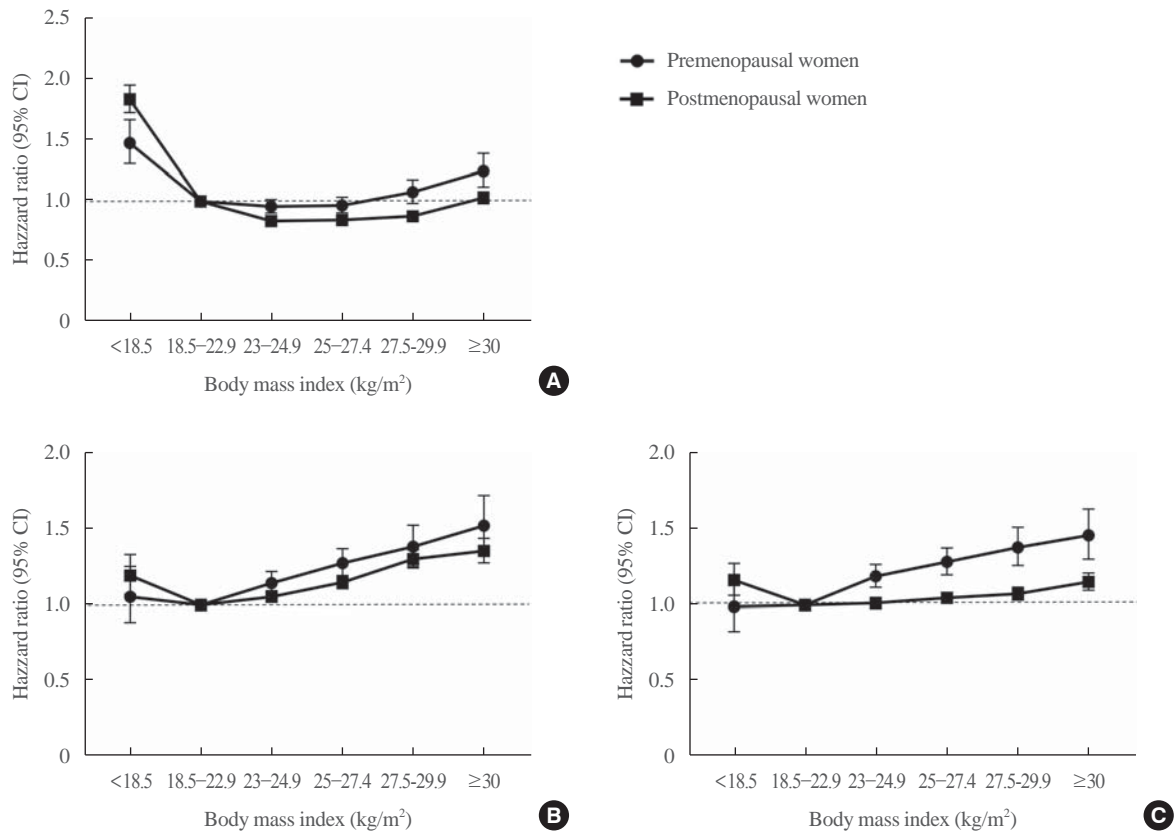

**Supplemental Fig. S1.** The risk of mortality, myocardial infarction, and stroke during the follow-up period according to body mass index. Hazard ratios for mortality (A), myocardial infarction (B), and stroke (C) after adjustment for age, smoking history, alcohol consumption, regular exercise, low income, hypertension, dyslipidemia, chronic kidney disease, and diabetes mellitus in premenopausal (closed circles) and postmenopausal women (closed square). CI, confidence interval.
