# Supplementary material for: Cardiovascular Outcomes of Obesity According to Menopausal Status: A Nationwide Population-Based Study
Source: PubMed Central journal article supplement — Endocrinol Metab (Seoul). 2021 Oct 21;36(5):1029–41. doi: 10.3803/EnM.2021.1197 (PMC8566123; doi:10.3803/enm.2021.1197), 2021-10-21
Supplement: enm-2021-1197-suppl6.pdf [file enm-2021-1197-suppl6.pdf]

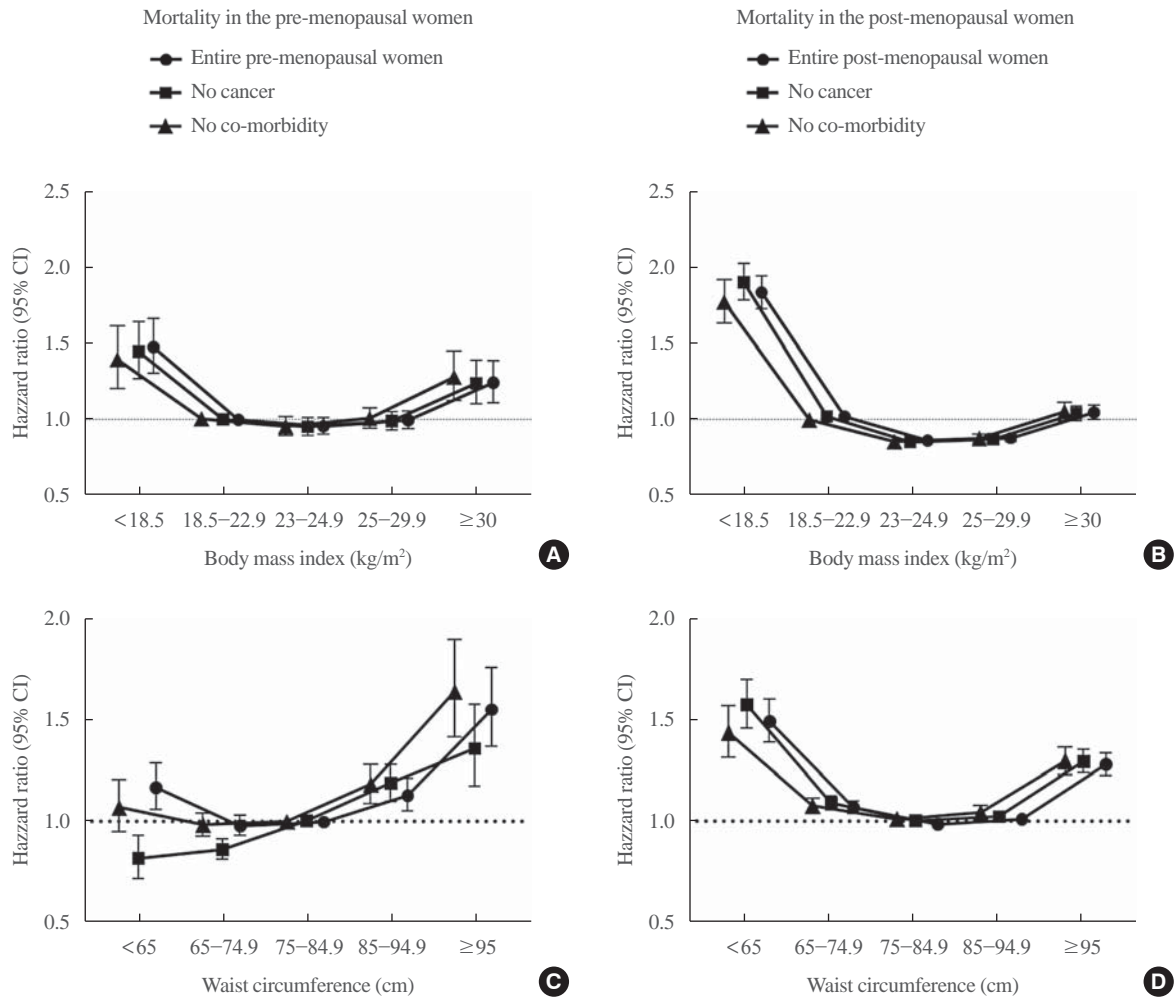

**Supplemental Fig. S2.** Differences in the effect of body mass index or waist circumference on mortality rate according to the presence of the premedical history of malignancies or co-morbidities. Hazard ratios for mortality according to body mass index (A, B) and waist circumference (C, D) after adjustment for age, smoking history, alcohol consumption, regular exercise, low income, hypertension, dyslipidemia, chronic kidney disease, and diabetes mellitus in premenopausal (A, C) and postmenopausal women (B, D) are presented. Closed circles, squares, and triangles represent the entire women, those without cancer, and those without any co-morbidities, respectively. CI, confidence interval.
